# Supplementary material for: HER2-Low Breast Cancer: Molecular Characteristics and Prognosis
Source: MDPI journal article supplement (doi:10.3390/cancers13112824), 2021-06-05
Supplement: s1 [file s1]

Article

# Supplementary Materials: HER2-Low Breast Cancer: Molecular Characteristics and Prognosis

Elisa Agostinetto, Mattia Rediti, Danai Fimereli, Véronique Debien, Martine Piccart, Philippe Aftimos, Christos Sotiriou and Evandro de Azambuja

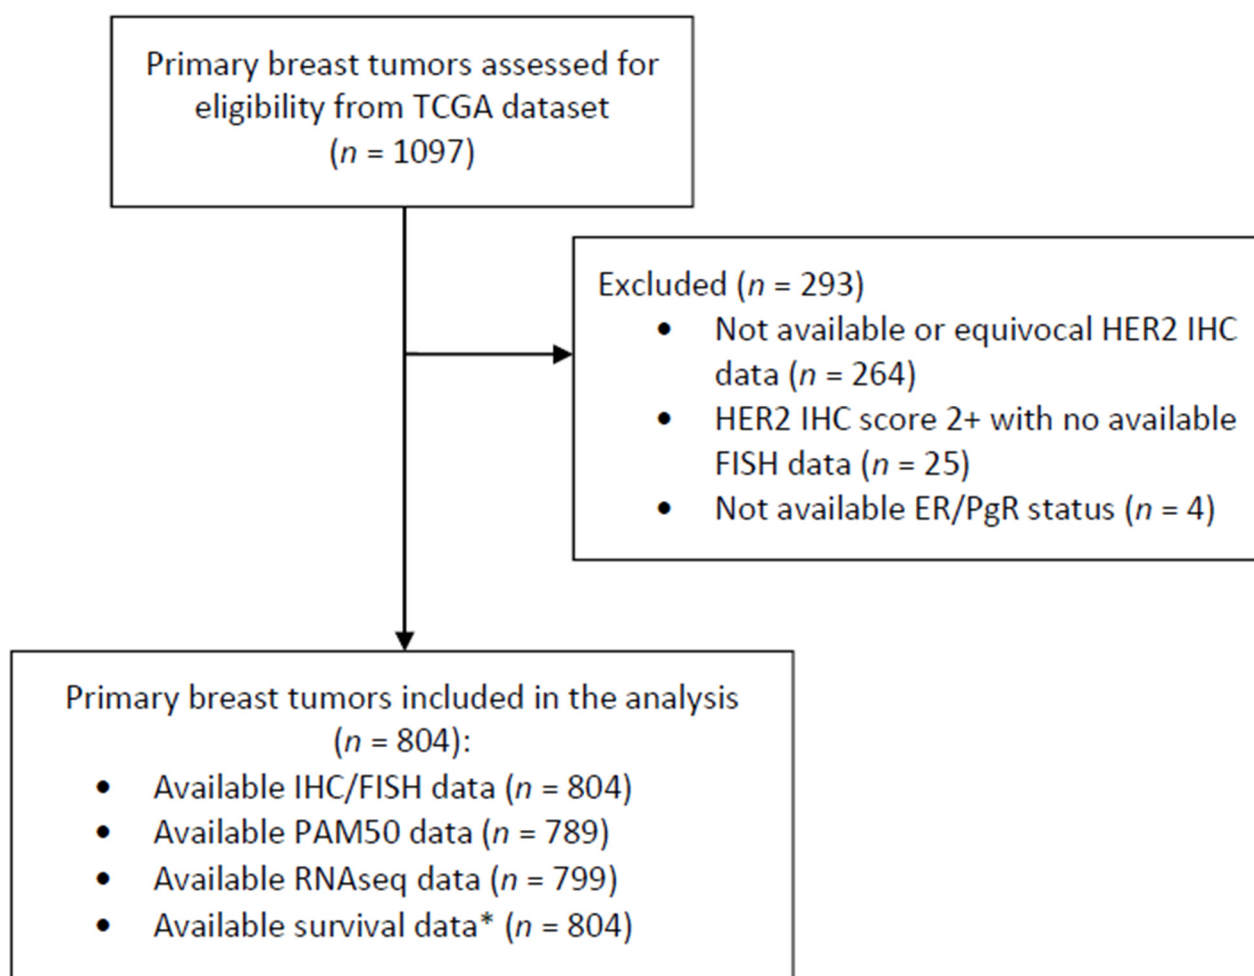

**Figure S1.** STROBE flow-chart resuming the patient selection process. \* Survival data were obtained from the TCGA Pan-Cancer Clinical Data Resource, developed by Liu et al. [15]. Abbreviations: TCGA: The Cancer Genome Atlas, IHC: immunohistochemistry, FISH: fluorescent in situ hybridization, ER: estrogen receptors, PgR: progesterone receptor.

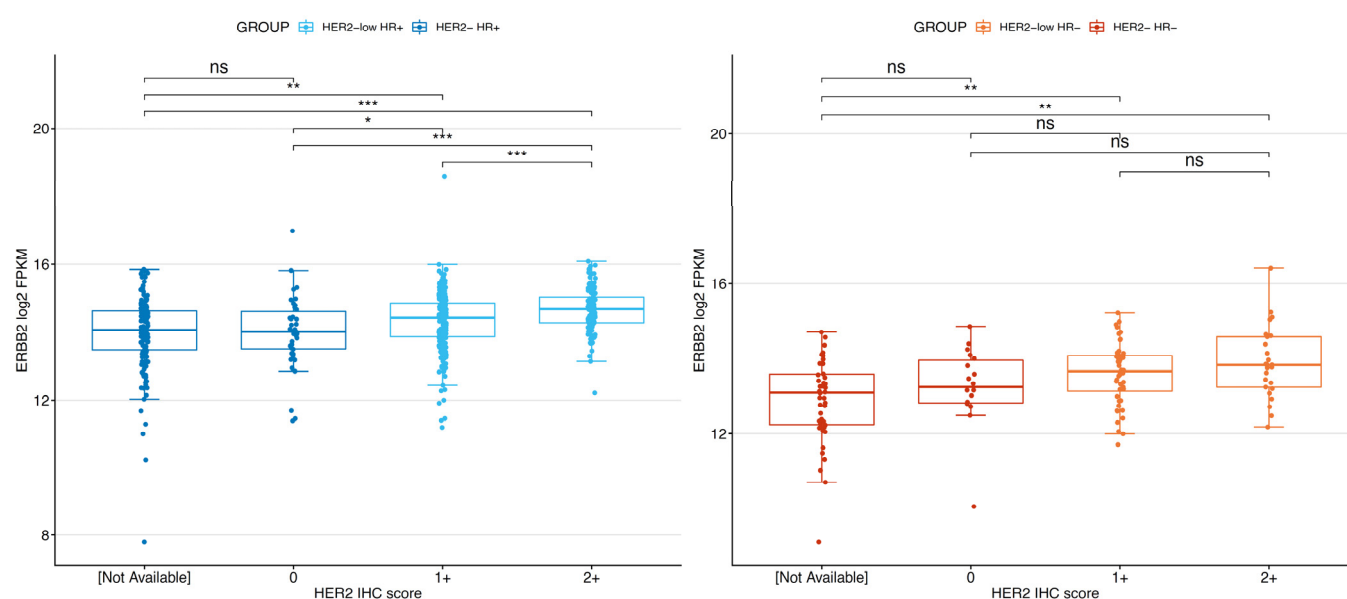

**Figure S2.** *ERBB2* gene expression levels according to HER2 IHC score in HER2-low/HR+ versus HER2-/HR+ tumors (left plot) and in HER2-low/HR- versus HER2-/HR- tumors (right plot). Statistical differences were assessed using a two-sided Mann–Whitney U-test followed by Benjamin and Hochberg correction for multiple testing. Abbreviations: IHC: immuno-histochemistry, ns = not significant; \* = adjusted  $p$ -value  $< 0.05$  and  $\geq 0.01$ ; \*\* = adjusted  $p$ -value  $< 0.01$  and  $\geq 0.001$ ; \*\*\* = adjusted  $p$ -value  $< 0.001$ .

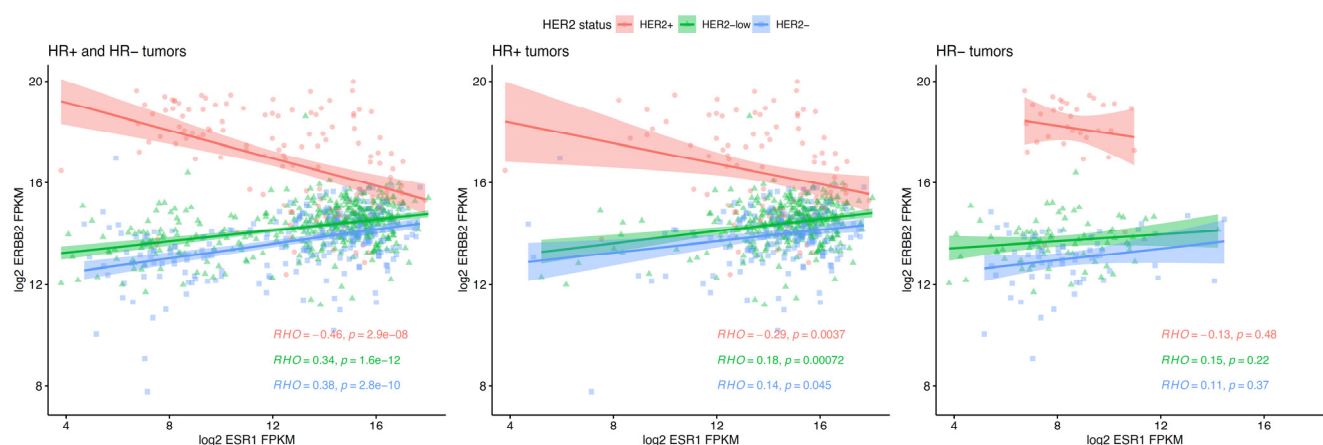

**Figure S3.** Correlation between *ERBB2* and *ESR1* gene expression levels according to HER2 status (i.e., positive, low and negative) in the whole population, in the HR+ and HR- subgroups. RHO is the Spearman correlation (color-coded according to HER2 status). Red, green, and blue colored regions indicate the 95% confidence interval for each regression line. Abbreviations: HR: hormone receptor.

**Table S1.** Primary breast tumors included in the present study ( $n = 804$ ).

| GROUP     | her2_ihc_score  | her2_fish_status | her2_status_by_ihc | er_status_by_ihc | pr_status_by_ihc | N  |
|-----------|-----------------|------------------|--------------------|------------------|------------------|----|
| HER2-/HR- | [Not Available] | [Not Evaluated]  | Negative           | Negative         | Negative         | 42 |
| HER2-/HR- | 0               | [Not Evaluated]  | Negative           | Negative         | Negative         | 13 |
| HER2-/HR- | [Not Available] | Negative         | Negative           | Negative         | Negative         | 4  |
| HER2-/HR- | 0               | Negative         | Negative           | Negative         | Negative         | 5  |
| HER2-/HR+ | [Not Available] | [Not Evaluated]  | Negative           | Positive         | Indeterminate    | 1  |
| HER2-/HR+ | [Not Available] | [Not Evaluated]  | Negative           | Positive         | Negative         | 24 |
| HER2-/HR+ | 0               | [Not Evaluated]  | Negative           | Positive         | Negative         | 5  |
| HER2-/HR+ | [Not Available] | Negative         | Negative           | Positive         | Negative         | 5  |
| HER2-/HR+ | 0               | Negative         | Negative           | Positive         | Negative         | 1  |
| HER2-/HR+ | [Not Available] | [Not Evaluated]  | Negative           | Negative         | Positive         | 4  |

|              |                 |                 |                 |                                                                                         |               |    |
|--------------|-----------------|-----------------|-----------------|-----------------------------------------------------------------------------------------|---------------|----|
| HER2-/HR+    | [Not Available] | Negative        | Negative        | Negative                                                                                | Positive      | 1  |
| HER2-/HR+    | [Not Available] | [Not Evaluated] | Negative        | Positive                                                                                | Positive      | 98 |
| HER2-/HR+    | 0               | [Not Evaluated] | Negative        | Positive                                                                                | Positive      | 25 |
| HER2-/HR+    | [Not Available] | Negative        | Negative        | Positive                                                                                | Positive      | 21 |
| HER2-/HR+    | 0               | Negative        | Negative        | Positive                                                                                | Positive      | 12 |
| HER2+/HR+    | 3+              | Positive        | Positive        | Indeterminate (considered positive as column "er_status_ihc_Percent_positive" = 20 29%) | Negative      | 1  |
| HER2+/HR+    | 3+              | Negative        | Equivocal       | Positive                                                                                | Negative      | 1  |
| HER2+/HR+    | 2+              | Positive        | Equivocal       | Positive                                                                                | Negative      | 5  |
| HER2+/HR+    | 3+              | [Not Evaluated] | Positive        | Positive                                                                                | Negative      | 6  |
| HER2+/HR+    | 3+              | Negative        | Positive        | Positive                                                                                | Negative      | 1  |
| HER2+/HR+    | [Not Available] | Positive        | Positive        | Positive                                                                                | Negative      | 2  |
| HER2+/HR+    | 2+              | Positive        | Positive        | Positive                                                                                | Negative      | 3  |
| HER2+/HR+    | 3+              | Positive        | Positive        | Positive                                                                                | Negative      | 5  |
| HER2+/HR+    | 2+              | Positive        | Equivocal       | Negative                                                                                | Positive      | 1  |
| HER2+/HR+    | 3+              | [Not Evaluated] | Positive        | Negative                                                                                | Positive      | 1  |
| HER2+/HR+    | 2+              | Positive        | Equivocal       | Positive                                                                                | Positive      | 11 |
| HER2+/HR+    | 3+              | Negative        | Indeterminate   | Positive                                                                                | Positive      | 1  |
| HER2+/HR+    | 2+              | Positive        | Indeterminate   | Positive                                                                                | Positive      | 2  |
| HER2+/HR+    | 3+              | [Not Evaluated] | Negative        | Positive                                                                                | Positive      | 1  |
| HER2+/HR+    | 3+              | [Not Available] | Positive        | Positive                                                                                | Positive      | 3  |
| HER2+/HR+    | 3+              | [Not Evaluated] | Positive        | Positive                                                                                | Positive      | 28 |
| HER2+/HR+    | 3+              | Negative        | Positive        | Positive                                                                                | Positive      | 1  |
| HER2+/HR+    | [Not Available] | Positive        | Positive        | Positive                                                                                | Positive      | 4  |
| HER2+/HR+    | 2+              | Positive        | Positive        | Positive                                                                                | Positive      | 12 |
| HER2+/HR+    | 3+              | Positive        | Positive        | Positive                                                                                | Positive      | 12 |
| HER2+/HR-    | 3+              | [Not Evaluated] | [Not Evaluated] | Negative                                                                                | Negative      | 1  |
| HER2+/HR-    | 2+              | Positive        | Equivocal       | Negative                                                                                | Negative      | 2  |
| HER2+/HR-    | 3+              | [Not Evaluated] | Negative        | Negative                                                                                | Negative      | 1  |
| HER2+/HR-    | 3+              | [Not Evaluated] | Positive        | Negative                                                                                | Negative      | 21 |
| HER2+/HR-    | 3+              | Negative        | Positive        | Negative                                                                                | Negative      | 1  |
| HER2+/HR-    | [Not Available] | Positive        | Positive        | Negative                                                                                | Negative      | 1  |
| HER2+/HR-    | 3+              | Positive        | Positive        | Negative                                                                                | Negative      | 5  |
| HER2-low/HR- | 1+              | Negative        | Equivocal       | Negative                                                                                | Negative      | 1  |
| HER2-low/HR- | 2+              | Negative        | Equivocal       | Negative                                                                                | Negative      | 24 |
| HER2-low/HR- | 1+              | [Not Available] | Negative        | Negative                                                                                | Negative      | 2  |
| HER2-low/HR- | 1+              | [Not Evaluated] | Negative        | Negative                                                                                | Negative      | 33 |
| HER2-low/HR- | 1+              | Negative        | Negative        | Negative                                                                                | Negative      | 9  |
| HER2-low/HR- | 1+              | Positive        | Negative        | Negative                                                                                | Negative      | 2  |
| HER2-low/HR- | 1+              | [Not Evaluated] | Positive        | Negative                                                                                | Negative      | 2  |
| HER2-low/HR- | 2+              | Negative        | Positive        | Negative                                                                                | Negative      | 1  |
| HER2-low/HR+ | 1+              | [Not Evaluated] | Negative        | Positive                                                                                | Indeterminate | 1  |
| HER2-low/HR+ | 2+              | Negative        | Equivocal       | Positive                                                                                | Negative      | 11 |
| HER2-low/HR+ | 1+              | [Not Evaluated] | Negative        | Positive                                                                                | Negative      | 17 |
| HER2-low/HR+ | 1+              | Negative        | Negative        | Positive                                                                                | Negative      | 8  |
| HER2-low/HR+ | 1+              | Positive        | Negative        | Positive                                                                                | Negative      | 1  |
| HER2-low/HR+ | 1+              | [Not Evaluated] | Positive        | Positive                                                                                | Negative      | 2  |
| HER2-low/HR+ | 1+              | Negative        | Equivocal       | Negative                                                                                | Positive      | 1  |
| HER2-low/HR+ | 2+              | Negative        | Equivocal       | Negative                                                                                | Positive      | 2  |
| HER2-low/HR+ | 1+              | [Not Evaluated] | Negative        | Negative                                                                                | Positive      | 3  |
| HER2-low/HR+ | 1+              | Negative        | Equivocal       | Positive                                                                                | Positive      | 2  |
| HER2-low/HR+ | 2+              | Negative        | Equivocal       | Positive                                                                                | Positive      | 92 |
| HER2-low/HR+ | 1+              | [Not Evaluated] | Indeterminate   | Positive                                                                                | Positive      | 1  |

|              |    |                 |               |          |          |     |
|--------------|----|-----------------|---------------|----------|----------|-----|
| HER2-low/HR+ | 2+ | Negative        | Indeterminate | Positive | Positive | 2   |
| HER2-low/HR+ | 1+ | [Not Evaluated] | Negative      | Positive | Positive | 125 |
| HER2-low/HR+ | 1+ | Negative        | Negative      | Positive | Positive | 55  |
| HER2-low/HR+ | 2+ | Negative        | Negative      | Positive | Positive | 1   |
| HER2-low/HR+ | 1+ | [Not Evaluated] | Positive      | Positive | Positive | 7   |
| HER2-low/HR+ | 2+ | Negative        | Positive      | Positive | Positive | 5   |

**Table S2.** Treatments received by all subjects and according to breast cancer subtype, as available in the TCGA dataset [13].

|              | All Subjects<br>N (%) | Available Treatment Data<br>N (%) | Anti-HER2 Treatment<br>N |
|--------------|-----------------------|-----------------------------------|--------------------------|
| All          | 804 (100)             | 628 (78.1)                        | 59                       |
| HER2-low/HR+ | 336                   | 279                               | 0                        |
| HER2-low/HR− | 74                    | 61                                | 1                        |
| HER2+/HR−    | 32                    | 23                                | 16                       |
| HER2+/HR+    | 101                   | 75                                | 40                       |
| HER2−/HR+    | 197                   | 144                               | 2                        |
| HER2−/HR−    | 64                    | 46                                | 0                        |
